# Supplementary material for: Prevalence of Steinert’s Myotonic Dystrophy and Utilization of Healthcare Services: A Population-Based Cross-Sectional Study
Source: MDPI journal article supplement (doi:10.3390/healthcare12080838), 2024-04-16
Supplement: s1 [file s1]

## Supplementary Material

† Collaborators/Membership of the DM1-CM Working Group

| Name       |                        | email                              | Affiliation                                                                                               |
|------------|------------------------|------------------------------------|-----------------------------------------------------------------------------------------------------------|
| First      | Last                   |                                    |                                                                                                           |
| Alfredo    | Rosado<br>Bartolomé    | alfredorosado76@gmail.com          | Comité Científico Orphanet-<br>España                                                                     |
| Carmen     | Prior de Castro        | carmen.prior@salud.madrid.org      | Department of Genetics,<br>Hospital Universitario La Paz,<br>Madrid, Spain                                |
| Gerardo    | Gutiérrez<br>Gutiérrez | gerardo.gutierrez@salud.madrid.org | Department of Neurology,<br>Hospital Universitario Infanta<br>Sofía, Madrid, Spain                        |
| Maria José | Trujillo Tiebas        | MJTrujillo@fjd.es                  | Department of Genetics,<br>Fundación Jiménez Díaz<br>University Hospital (IIS-FJD,<br>UAM), Madrid, Spain |
